# Supplementary material
Source: PubMed Central journal article supplement (PMC3044682)
Supplement: pgen.1002009.s004.pdf [file pgen.1002009.s004.pdf]

**Table S1.** Yeast strains used in this study

| Name      | Genotype                                                                                                                                                                                             |
|-----------|------------------------------------------------------------------------------------------------------------------------------------------------------------------------------------------------------|
| WS        | <i>MATa-inc ade2-1 can1-100 his3-11,15 leu2Δ::SFA1 trp1-1 ura3-1 ade3::GAL-HO</i>                                                                                                                    |
| OS350     | <i>MATa-inc ade2-1 can1-100 his3-11,15 leu2Δ::SFA1 trp1-1 ura3-1 ade3::GAL-HO ACT1Δi ChrIII-GAL1p::leu2Δ3'::ACT1-iΔ3'::Sμ350::URA3 ChrXV-HYG::HO::ACT1-iΔ5'::leu2Δ5'</i>                             |
| OS350r    | <i>MATa-inc ade2-1 can1-100 his3-11,15 leu2Δ::SFA1 trp1-1 ura3-1 ade3::GAL-HO ACT1Δi ChrIII-GAL1p::leu2Δ3'::ACT1-iΔ3'::Sμ350rev::URA3 ChrXV-HYG::HO::ACT1-iΔ5'::leu2Δ5'</i>                          |
| OWS       | <i>MATa-inc ade2-1 can1-100 his3-11,15 leu2Δ::SFA1 trp1-1 ura3-1 ade3::GAL-HO ACT1Δi ChrIII-GAL1p::leu2Δ3'::ACT1-iΔ3'::URA3 ChrXV-HYG::HO::ACT1-iΔ5'::leu2Δ5'</i>                                    |
| OMYC      | <i>MATa-inc ade2-1 can1-100 his3-11,15 leu2Δ::SFA1 trp1-1 ura3-1 ade3::GAL-HO ACT1Δi ChrIII-GAL1p::leu2Δ3'::ACT1-iΔ3'::MYC::URA3 ChrXV-HYG::HO::ACT1-iΔ5'::leu2Δ5'</i>                               |
| OS350h    | <i>MATa-inc ade2-1 can1-100 his3-11,15 leu2Δ::SFA1 trp1-1 ura3-1 ade3::GAL-HO ACT1Δi ChrIII-GAL1p::leu2Δ3'::ACT1-iΔ3'::Sμ350::URA3 ChrXV-HYG::HO::ACT1-iΔ5'::leu2Δ5' hpr1Δ::kanMX4</i>               |
| OMYCh     | <i>MATa-inc ade2-1 can1-100 his3-11,15 leu2Δ::SFA1 trp1-1 ura3-1 ade3::GAL-HO ACT1Δi ChrIII-GAL1p::leu2Δ3'::ACT1-iΔ3'::MYC::URA3 ChrXV-HYG::HO::ACT1-iΔ5'::leu2Δ5' hpr1Δ::kanMX4</i>                 |
| OS350-101 | <i>MATa-inc ade2-1 can1-100 his3-11,15 leu2Δ::SFA1 trp1-1 ura3-1 ade3::GAL-HO ACT1Δi ChrIII-GAL1p::leu2Δ3'::ACT1-iΔ3'::Sμ350::URA3 ChrXV-HYG::HO::ACT1-iΔ5'::leu2Δ5' hpr1-101</i>                    |
| OS350-L4  | <i>MATa-inc ade2-1 can1-100 his3-11,15 leu2Δ::SFA1 trp1-1 ura3-1 ade3::GAL-HO ACT1Δi ChrIII-GAL1p::leu2Δ3'::ACT1-iΔ3'::Sμ350::URA3 ChrXV-HYG::HO::ACT1-iΔ5'::leu2Δ5' dnl4Δ::natMX4</i>               |
| OS350-L4h | <i>MATa-inc ade2-1 can1-100 his3-11,15 leu2Δ::SFA1 trp1-1 ura3-1 ade3::GAL-HO ACT1Δi ChrIII-GAL1p::leu2Δ3'::ACT1-iΔ3'::Sμ350::URA3 ChrXV-HYG::HO::ACT1-iΔ5'::leu2Δ5' hpr1Δ::kanMX4 dnl4Δ::natMX4</i> |
| OS350-U1  | <i>MATa-inc ade2-1 can1-100 his3-11,15 leu2Δ::SFA1 trp1-1 ura3-1 ade3::GAL-HO ACT1Δi ChrIII-GAL1p::leu2Δ3'::ACT1-iΔ3'::Sμ350::URA3 ChrXV-HYG::HO::ACT1-iΔ5'::leu2Δ5' ung1Δ::natMX4</i>               |
| OS350-U1h | <i>MATa-inc ade2-1 can1-100 his3-11,15 leu2Δ::SFA1 trp1-1 ura3-1 ade3::GAL-HO ACT1Δi ChrIII-GAL1p::leu2Δ3'::ACT1-iΔ3'::Sμ350::URA3 ChrXV-HYG::HO::ACT1-iΔ5'::leu2Δ5' hpr1Δ::kanMX4 ung1Δ::natMX4</i> |

All strains were constructed for this study except WS (González-Barrera et al 2002)

==

!
